# Supplementary material for: Phylomitogenomics of two Neotropical species of long-legged crickets Endecous Saussure, 1878 (Orthoptera: Phalangopsidae)
Source: PubMed Central journal article supplement (PMC11034622; doi:10.1590/1678-4685-gmb-2023-0144), 2024-04-15
Supplement: 1415-4757-GMB-46-03-s1-e20230144-s1.pdf [file 1415-4757-GMB-46-03-s1-e20230144-s1.pdf]

**Supplementary Material to “Phylomitogenomics of two Neotropical species of long-legged crickets *Endecous* Saussure, 1878 (Orthoptera: Phalangopsidae)”**

**Table S1** - Information on the investigated species, including mitochondrial genome sizes and NCBI access numbers.

| Taxa                                                   | Species                                            | Size (bp) | Accession number        | Reference                                         |
|--------------------------------------------------------|----------------------------------------------------|-----------|-------------------------|---------------------------------------------------|
| <b>Superfamily Grylloidea</b>                          |                                                    |           |                         |                                                   |
| <b>Gryllidae</b>                                       |                                                    |           |                         |                                                   |
| Eneopterinae                                           | <i>Cardiodactylus mui</i> ri Otte, 2007            | 16,328    | NC037914                | Dong et al., 2017                                 |
|                                                        | <i>Pseudolebinthus</i> sp. Robillard, 2006         | 16,075    | MN414243                | Salazar et al., 2020                              |
|                                                        | <i>Xenogryllus marmoratus</i> (Haan, 1844)         | 15,762    | NC041236                | Ma et al., 2019b                                  |
| Gryllinae                                              | <i>Acheta domesticus</i> (Linnaeus, 1758)          | 16,003    | SRR2230498              | Zhou et al., 2018                                 |
|                                                        | <i>Gryllodes sigillatus</i> (Walker, 1869)         | 16,369    | NC057195                | Yang et al., 2021                                 |
|                                                        | <i>Gryllus assimilis</i> (Fabricius, 1775)         | 16,050    | SRR10619397             | Submitted by Harvard University (2019)            |
|                                                        | <i>Gryllus bimaculatus</i> De Geer, 1773           | 16,075    | MT993975                | Park et al., 2021                                 |
|                                                        | <i>Gryllus firmus</i> Scudder, 1902                | 16,029    | SRR835515               | Nanoth Vellichirammal et al., 2014                |
|                                                        | <i>Gryllus lineaticeps</i> Stål, 1861              | 15,607    | NC057052                | Torson et al., 2022                               |
|                                                        | <i>Gryllus pennsylvanicus</i> Burmeister, 1838     | 16,066    | SRR3987008              | Submitted by University of Western Ontario (2016) |
|                                                        | <i>Gryllus rubens</i> Scudder, 1902                | 16,010    | SRR3182700              | Submitted by Museum fuer Naturkunde (2016)        |
|                                                        | <i>Gryllus texensis</i> Cade & Otte, 2000          | 16,017    | SRR6761203              | Submitted by Museum fuer Naturkunde (2018)        |
|                                                        | <i>Gryllus veletis</i> (Alexander & Bigelow, 1960) | 15,686    | MW322713                | Torson et al., 2022                               |
| <i>Loxoblemmus doenitzi</i> Stein, 1881                | 15,396                                             | NC033985  | Zhou, 2016              |                                                   |
| <i>Loxoblemmus equestris</i> Saussure, 1877            | 16,314                                             | KU562919  | Yang et al., 2016       |                                                   |
| <i>Tarbinskiellus portentosus</i> (Lichtenstein, 1796) | 15,710                                             | BK059220  | Homchan and Gupta, 2022 |                                                   |

| Taxa                  | Species                                                          | Size (bp) | Accession number | Reference                                                      |
|-----------------------|------------------------------------------------------------------|-----------|------------------|----------------------------------------------------------------|
|                       | <i>Teleogryllus commodus</i> (Walker, 1869)                      | 15,598    | SRR1424310       | Submitted by University of New South Wales (2014)              |
|                       | <i>Teleogryllus emma</i> (Ohmachi & Matsuura, 1951)              | 15,660    | NC011823         | Ye et al., 2008                                                |
|                       | <i>Teleogryllus infernalis</i> (Saussure, 1877)                  | 15,512    | MK903574         | Chang et al., 2020                                             |
|                       | <i>Teleogryllus occipitalis</i> (Serville, 1838)                 | 15,501    | LC521855         | Kataoka et al., 2020                                           |
|                       | <i>Teleogryllus oceanicus</i> (Le Guillou, 1841)                 | 15,660    | NC028619         | Zhou et al., 2017a                                             |
|                       | <i>Turanogryllus eous</i> Bey-Bienko, 1956                       | 16,045    | NC060317         | Ma et al., 2019c                                               |
|                       | <i>Velarifictorus hemelytrus</i> (Saussure, 1877)                | 16,123    | NC030762         | Yang et al., 2016                                              |
| Oecanthinae           | <i>Oecanthus rufescens</i> Serville, 1838                        | 15,617    | KX057720         | Zhou et al., 2017b                                             |
|                       | <i>Oecanthus sinensis</i> Walker, 1869                           | 16,142    | NC034799         | Li et al., 2019                                                |
| Podoscirtinae         | <i>Truljalia hibinonis</i> (Matsumura, 1917)                     | 15,120    | NC034797         | Li et al., 2019                                                |
| Sclerogryllinae       | <i>Sclerogryllus punctatus</i> (Brunner von Wattenwyl, 1893)     | 15,438    | OL875084         | He, 2021                                                       |
| <b>Mogoplistidae</b>  |                                                                  |           |                  |                                                                |
|                       | <i>Ornebius bimaculatus</i> (Shiraki, 1930)                      | 16,136    | NC039666         | Ma and Li, 2018                                                |
| Mogoplistinae         | <i>Ornebius fuscicercis</i> (Shiraki, 1930)                      | 16,368    | NC039739         | Ma and Li, 2018                                                |
|                       | <i>Ornebius kanetataki</i> (Matsumura, 1904)                     | 16,589    | NC039667         | Ma and Li, 2018                                                |
| <b>Phalangopsidae</b> |                                                                  |           |                  |                                                                |
|                       | <i>Cacoplistes rogenhoferi</i> Saussure, 1877                    | 16,018    | NC039664         | Ma and Li, 2018                                                |
| Cachoplistinae        | <i>Meloimorpha japonica</i> (Haan, 1844)                         | 15,880    | NC039665         | Ma and Li, 2018                                                |
|                       | <i>Endecous chape</i> Souza-Dias & de Mello, 2017                | 16,266    | OQ935836         | This study                                                     |
| Phalangopsinae        | <i>Endecous onthophagus</i> (Berg, 1891)                         | 16,023    | OQ935837         | This study                                                     |
|                       | <i>Phaeophilacris bredoides</i> Kaltenbach, 1986                 | 16,085    | SRR1811982       | Wipfler et al., 2019                                           |
| <b>Trigonidiidae</b>  |                                                                  |           |                  |                                                                |
|                       | <i>Dianemobius fascipes</i> (Walker, 1869)                       | 15,363    | NC045846         | Ma et al., 2019a                                               |
|                       | <i>Dianemobius furumagiensis</i> (Ohmachi & Furukawa, 1929)      | 15,350    | NC045847         | Ma et al., 2019a                                               |
| Nemobiinae            | <sup>a</sup> <i>Dianemobius nigrofasciatus</i> (Matsumura, 1904) | 15,359    | BK063406         | This study                                                     |
|                       | <i>Marinemobius asahinai</i> (Yamasaki, 1979)                    | 15,791    | DRR300664        | Submitted by Department of Evolutionary Studies of Biosystems, |

| Taxa                               | Species                                            | Size (bp) | Accession number | Reference                                                      |
|------------------------------------|----------------------------------------------------|-----------|------------------|----------------------------------------------------------------|
|                                    |                                                    |           |                  | SOKENDAI (The Graduate University for Advanced Studies) (2021) |
|                                    | <i>Polionemobius taprobanensis</i> (Walker, 1869)  | 16,641    | NC045848         | Ma et al., 2019a                                               |
|                                    | <i>Homoeoxipha nigripes</i> Xia & Liu, 1993        | 15,679    | NC045841         | Ma et al., 2019a                                               |
| Trigonidiinae                      | <i>Natula pravdini</i> (Gorochov, 1985)            | 15,817    | NC050742         | Ma and Li, 2017                                                |
|                                    | <i>Svistella anhuiensis</i> He, Li & Liu, 2009     | 16,494    | NC053543         | Ma and Li, 2017                                                |
|                                    | <i>Trigonidium sjostedti</i> (Chopard, 1925)       | 15,763    | NC032077         | Song et al., 2016                                              |
| <b>Superfamily Gryllotalpoidea</b> |                                                    |           |                  |                                                                |
| <b>Gryllotalpidae</b>              |                                                    |           |                  |                                                                |
|                                    | <i>Gryllotalpa orientalis</i> Burmeister, 1838     | 15,521    | AY660929         | Kim et al., 2005                                               |
| Gryllotalpinae                     | <i>Gryllotalpa pluvialis</i> (Mjöberg, 1913)       | 15,525    | EU938371         | Fenn et al., 2008                                              |
|                                    | <i>Gryllotalpa unispina</i> Saussure, 1874         | 15,513    | NC029148         | Wang et al., 2013                                              |
| <b>Myrmecophilidae</b>             |                                                    |           |                  |                                                                |
| Myrmecophilinae                    | <i>Myrmecophilus kubotai</i> Maruyama, 2004        | 15,345    | MZ440658         | Sanno et al., 2021                                             |
|                                    | <i>Myrmecophilus manni</i> Schimmer, 1911          | 15,323    | NC011301         | Fenn et al., 2008                                              |
| <b>Superfamily Tettigonioidae</b>  |                                                    |           |                  |                                                                |
| <b>Tettigoniidae</b>               |                                                    |           |                  |                                                                |
| Tettigoniinae                      | <i>Anabrus simplex</i> Haldeman, 1852              | 15,766    | EF373911         | Fenn et al., 2007                                              |
| Meconematinae                      | <i>Phlugiolopsis punctata</i> Wang, Li & Liu, 2012 | 17,461    | NC068775         | Liang and Bian, 2022                                           |

<sup>a</sup>Partial mitochondrial genome obtained from raw data with access number DRR140412 (Submitted by Animal Physiology, Graduate School of Science, Osaka City University (2020)).

## References

- Chang H, Qiu Z, Yuan H, Wang X, Li X, Sun H, ... and Huang, Y (2020) Evolutionary rates of and selective constraints on the mitochondrial genomes of Orthoptera insects with different wing types. *Molecular phylogenetics and evolution* 145:106734.
- Dong J, Vicente N, Chintauan-Marquier I, Ramadi C, Dettai A and Robillard T. (2017) Complete mitochondrial genome and taxonomic revision of *Cardiodactylus muiri* Otte, 2007 (Gryllidae: Eneopterinae: Lebinthini). *Zootaxa* 4268:101-116.
- Fenn JD, Cameron SL and Whiting MF (2007) The complete mitochondrial genome sequence of the Mormon cricket (*Anabrus simplex*: Tettigoniidae: Orthoptera) and an analysis of control region variability. *Insect molecular biology* 16:239-252.

Fenn JD, Song H, Cameron SL and Whiting MF (2008) A preliminary mitochondrial genome phylogeny of Orthoptera (Insecta) and approaches to maximizing phylogenetic signal found within mitochondrial genome data. *Molecular Phylogenetics and Evolution* 49:59-68.

He ZQ (2021) Submitted (15-DEC-2021) School of Life Sciences, East China Normal University, 500 Dongchuan Road, Shanghai, Shanghai 200241, China.

Homchan S and Gupta YM (2022) The complete mitochondrial genome of giant cricket, *Tarbinskiellus portentosus* (Orthoptera: Gryllidae) and its curation. *Mitochondrial DNA Part B* 7:1427-1431.

Kataoka K, Minei R, Ide K, Ogura A, Takeyama H, Takeda M, ... and Asahi T (2020) The draft genome dataset of the Asian cricket *Teleogryllus occipitalis* for molecular research toward entomophagy. *Frontiers in Genetics* 11:470.

Kim I, Cha SY, Yoon MH, Hwang JS, Lee SM, Sohn HD, and Jin BR (2005) The complete nucleotide sequence and gene organization of the mitochondrial genome of the oriental mole cricket, *Gryllotalpa orientalis* (Orthoptera: Gryllotalpidae). *Gene* 353:155-168.

Li J, Chen Q, Wen M, Wang J, Wang Y and Ren B (2019) Phylogeny and acoustic signal evolution of a pure tone song katydid *Pseudophyllus titan* (Orthoptera: Tettigoniidae) based on the complete mitogenome. *Mitochondrial DNA Part A* 30:385-396.

Liang L and Bian X (2022) Submitted (01-MAR-2022) Guangxi Normal University, Key Laboratory of Ecology of Rare and Endangered Species and Environmental Protection (Guangxi Normal University), Yanzhong Road, Guilin, GuangXi 541000, China.

Ma C and Li J (2017) Mitochondrial genome sequence and gene rearrangement provide insights into the taxonomic affiliation of sword-tailed crickets. Submitted (17-DEC-2017) Institute of Apicultural Research, Chinese Academy of Agricultural Sciences, Beijing, China

Ma C and Li J (2018) Comparative analysis of mitochondrial genomes of the superfamily Grylloidea (Insecta, Orthoptera) reveals phylogenetic distribution of gene rearrangements. *International journal of biological macromolecules* 120:1048-1054.

Ma C, Wang Y, Zhang L and Li J (2019) Mitochondrial genome characterization of the family Trigonidiidae (Orthoptera) reveals novel structural features and nad1 transcript ends. *Scientific Reports* 9:19092.

Ma C, Zhang L and Li J (2019) Characterization of the complete mitochondrial genome of a bush cricket *Xenogryllus marmoratus* (Insecta: Orthoptera). *Mitochondrial DNA Part B* 4:172-173.

Ma C, Zhang L and Li J (2019) The complete mitochondrial genome of a field cricket *Turanogryllus eous* (Insecta: Orthoptera). *Mitochondrial DNA Part B* 4:3852-3853.

Nanoth Vellichirammal N, Zera AJ, Schilder RJ, Wehrkamp C, Riethoven JJM and Brisson JA (2014) De novo transcriptome assembly from fat body and flight muscles transcripts to identify morph-specific gene expression profiles in *Gryllus firmus*. *PLoS one* 9:e82129.

Park B, Choi EH, Kim G, Shin CR, Hwang J, Baek SY and Hwang UW (2021) The complete mitochondrial genome of the two-spotted cricket *Gryllus bimaculatus* (Orthoptera: Gryllidae) from South Korea. *Mitochondrial DNA Part B* 6:1144-1146.

Salazar K, Murphy RJ, Guillaume M, Nattier R and Robillard T (2020) *Pseudolebinthus lunipterus* sp. nov.: a striking deaf and mute new cricket from Malawi (Orthoptera, Gryllidae, Eneopterinae). *PeerJ* 8:8204.

Sanno R, Kataoka K, Hayakawa S, Ide K, Nguyen CN, Nguyen TP, Le BTN, Kim OTP, Mineta K, Takeyama H, Takeda M, Sato T, Suzuki T, Yura K and Asahi T (2021) Submitted (24-JUN-2021) Advanced Science and Engineering, WASEDA University, Wakamatsu 2-2, Shinjuku, Tokyo 185-8480, Japan.

Song N, Li H, Song F and Cai W (2016) Molecular phylogeny of Polyneoptera (Insecta) inferred from expanded mitogenomic data. *Scientific Reports* 6:36175.

Torson AS, Hicks AM, Baragar CE, Smith DR and Sinclair BJ (2022) The mitochondrial genomes of two *Gryllus* crickets (Grylloidea: Gryllidae) via RNA-seq. *Mitochondrial DNA Part B* 7:106-107.

Wang P, Zhi Y and Zhang D (2013) Sequencing and Analysis of *Gryllotalpa unispina* Mitochondrial Genome. Submitted (11-APR-2013) College of Life Sciences, Hebei University, 180 Wusidong Road, Baoding, Hebei 071002, China.

- Wipfler B, Letsch H, Frandsen PB, Kapli P, Mayer C, Bartel D, ... and Simon S (2019) Evolutionary history of Polyneoptera and its implications for our understanding of early winged insects. *Proceedings of the National Academy of Sciences* 116:3024-3029.
- Yang J, Dong H, He M and Gao J (2021) Mitochondrial genome characterization of *Grylloides sigillatus* (Orthoptera: Gryllidae) and its phylogenetic implications. *Mitochondrial DNA Part B* 6:1056-1058.
- Yang J, Ren Q and Huang Y (2016) Complete mitochondrial genomes of three crickets (Orthoptera: Gryllidae) and comparative analyses within Ensifera mitogenomes. *Zootaxa* 4092:529-547.
- Ye W, Dang JP, Xie LD and Huang Y (2008) Complete mitochondrial genome of *Teleogryllus emma* (Orthoptera: Gryllidae) with a new gene order in Orthoptera.
- Zhou ZJ (2016) Towards a higher-level phylogeny of ensiferan insects inferred from mitochondrial genome sequences. Submitted (06-APR-2016) College of Life Sciences, Hebei University, No. 180 Wusidong Road, Baoding, Hebei 071002, China
- Zhou C, Liu S, Song W, Luo S, Meng G, Yang C, ... and Zhou X (2018) Characterization of viral RNA splicing using whole-transcriptome datasets from host species. *Scientific reports* 8:3273.
- Zhou JX, Jia YC, Yang XC and Li Q (2017) The complete mitochondrial genome of the black field cricket, *Teleogryllus oceanicus*. *Mitochondrial DNA Part A* 28:229-230.
- Zhou Z, Zhao L, Liu N, Guo H, Guan B, Di J and Shi F (2017) Towards a higher-level Ensifera phylogeny inferred from mitogenome sequences. *Molecular Phylogenetics and Evolution* 108:22-33.
