# Supplementary material for: Phylomitogenomics of two Neotropical species of long-legged crickets Endecous Saussure, 1878 (Orthoptera: Phalangopsidae)
Source: PubMed Central journal article supplement (PMC11034622; doi:10.1590/1678-4685-gmb-2023-0144), 2024-04-15
Supplement: 1415-4757-GMB-46-03-s1-e20230144-s2.pdf [file 1415-4757-GMB-46-03-s1-e20230144-s2.pdf]

**Supplementary Material to “Phylomitogenomics of two Neotropical species of long-legged crickets *Endecous* Saussure, 1878 (Orthoptera: Phalangopsidae)”**

**Table S2** – Protein-coding genes that have been recovered and annotated for phylogenetic analysis, along with their respective NCBI accession numbers.

| Species                         | Atp6     | Atp8     | COI      | COII     | COIII    | CytB     | ND1      | ND2      | ND3      | ND4      | ND4I     | ND5      | ND6 |
|---------------------------------|----------|----------|----------|----------|----------|----------|----------|----------|----------|----------|----------|----------|-----|
| <i>Acheta domesticus</i>        | -        | -        | -        | -        | BK063533 | -        | BK063534 | -        | -        | -        | -        | -        | -   |
| <i>Gryllus assimilis</i>        | BK063535 | BK063536 | BK063537 | BK063538 | BK063539 | BK063540 | -        | BK063541 | BK063542 | BK063543 | BK063544 | BK063545 | -   |
| <i>Gryllus firmus</i>           | BK063546 | BK063547 | BK063548 | BK063549 | -        | -        | BK063550 | -        | BK063551 | BK063552 | BK063553 | BK063554 | -   |
| <i>Gryllus pennsylvanicus</i>   | -        | -        | -        | -        | -        | -        | -        | -        | -        | BK063555 | -        | -        | -   |
| <i>Gryllus rubens</i>           | BK063556 | BK063557 | BK063558 | BK063559 | BK063560 | BK063561 | BK063562 | -        | BK063563 | BK063564 | BK063565 | BK063566 | -   |
| <i>Gryllus texensis</i>         | BK063567 | BK063568 | BK063569 | BK063570 | BK063571 | BK063572 | BK063573 | -        | BK063574 | BK063575 | BK063576 | BK063577 | -   |
| <i>Phaeophilacris bredoides</i> | -        | -        | BK063578 | -        | -        | -        | -        | -        | -        | -        | BK063579 | -        | -   |
| <i>Teleogryllus commodus</i>    | BK063580 | -        | BK063581 | BK063582 | BK063583 | BK063584 | -        | -        | -        | -        | BK063585 | -        | -   |

---

| Species                          | Atp6     | Atp8 | COI      | COII     | COIII    | CytB     | ND1      | ND2      | ND3      | ND4      | ND4I     | ND5      | ND6      |
|----------------------------------|----------|------|----------|----------|----------|----------|----------|----------|----------|----------|----------|----------|----------|
| <i>Marinemobius<br/>asahinai</i> | BK063586 | -    | BK063587 | BK063588 | BK063589 | BK063590 | BK063591 | BK063592 | BK063593 | BK063594 | BK063595 | BK063596 | BK063597 |

---

(-) Missing data.
