# Supplementary material for: Phylomitogenomics of two Neotropical species of long-legged crickets Endecous Saussure, 1878 (Orthoptera: Phalangopsidae)
Source: PubMed Central journal article supplement (PMC11034622; doi:10.1590/1678-4685-gmb-2023-0144), 2024-04-15
Supplement: 1415-4757-GMB-46-03-s1-e20230144-s3.pdf [file 1415-4757-GMB-46-03-s1-e20230144-s3.pdf]

**Supplementary Material to “Phylomitogenomics of two Neotropical species of long-legged crickets *Endecous* Saussure, 1878 (Orthoptera: Phalangopsidae)”**

**Table S3** – Length and nucleotide composition of the mitogenome genes of *Dianemobius nigrofasciatus*, *Endecous chape*, and *E. onthophagus*.

| Mitogenomes                           | Size (bp)         | T%             | C%             | A%             | G%             |             |             |
|---------------------------------------|-------------------|----------------|----------------|----------------|----------------|-------------|-------------|
| <sup>a</sup> <i>D. nigrofasciatus</i> | 15,359            | 36.6           | 18.4           | 35.8           | 9.2            |             |             |
| <i>E. chape</i>                       | 16,266            | 34.6           | 18.4           | 37.8           | 9.2            |             |             |
| <i>E. onthophagus</i>                 | 16,023            | 33.1           | 19.7           | 37.6           | 9.6            |             |             |
| <sup>b</sup> Genes                    |                   |                |                |                |                | Start codon | Stop codon  |
| <i>Atp 6</i>                          | 684/684/684       | 40.5/38.7/36.7 | 19.7/20.6/22.1 | 31.1/30.8/31.7 | 8.6/9.8/9.5    | ATG/ATG/ATG | TAA/TAA/TAA |
| <i>Atp 8</i>                          | 162/171/165       | 37.0/38.0/38.8 | 14.8/20.5/21.8 | 42.0/38.0/35.8 | 6.2/3.5/3,6    | ATT/ATA/ATA | TAA/TAA/TAA |
| <i>COI</i>                            | 1,536/1,542/1,536 | 37.6/35.3/35.4 | 19.4/19.5/20.1 | 28.1/30.1/29.4 | 14.9/15.1/15.2 | CAA/ATA/ACG | TAA/TAA/TAA |
| <i>COII</i>                           | 696/678/678       | 35.5/34.7/36.3 | 19.0/21.1/20.1 | 34.6/32.9/32.6 | 10.9/11.4/11.1 | ATG/ATG/ATG | TAA/--/--   |
| <i>COIII</i>                          | 789/789/789       | 39.5/37.8/34.0 | 18.8/20.3/22.2 | 29.4/29.0/30.3 | 12.3/12.9/13.6 | ATG/ATG/ATG | TAA/TAA/TAA |

| Mitogenomes | Size (bp)         | T%             | C%             | A%             | G%             |             |             |
|-------------|-------------------|----------------|----------------|----------------|----------------|-------------|-------------|
| <i>CYTB</i> | 1,137/1,140/1,140 | 38.7/38.4/35.2 | 20.1/20.5/22.4 | 29.5/29.6/30.1 | 11.8/11.4/12.4 | ATG/ATG/ATG | TAG/TAA/TAA |
| <i>ND1</i>  | 936/915/915       | 44.3/47.1/46.3 | 8.4/9.0/9.4    | 27.5/25.5/22.4 | 19.8/18.5/21.9 | TTG/TTG/TTG | ---/---/--- |
| <i>ND2</i>  | 1,020/1,035/1,041 | 45.2/40.4/40.7 | 17.7/17.1/17.0 | 29.3/35.4/34.6 | 7.7/7.1/7.7    | ATT/ATT/ATT | TAA/TAA/TAA |
| <i>ND3</i>  | 354/327/234       | 45.2/40.4/40.6 | 17.5/19.9/17.9 | 29.9/30.0/32.1 | 7.3/9.8/9.4    | ATT/ATT/ATT | TAG/TAA/TAA |
| <i>ND4</i>  | 1,341/1,341/1,341 | 42.3/45.7/45.4 | 7.2/7.4/7.9    | 31.5/27.2/26.8 | 19.1/19.7/19.9 | ATG/ATG/ATG | ---/---/--- |
| <i>ND4L</i> | 291/276/276       | 46.447.5/48.2  | 2.4/4.7/4.3    | 32.6/26.1/23.9 | 18.6/21.7/23.6 | ATG/ATA/ATG | TAA/TAA/TAG |
| <i>ND5</i>  | 1,725/1,731/1,734 | 42.1/44.7/46.0 | 7.3/8.2/8.1    | 32.1/29.4/25.4 | 18.5/17.7/20.5 | ATT/ATA/ATA | ---/---/--- |
| <i>ND6</i>  | 489/492/504       | 41.3/42.9/37.9 | 19.2/15.9/21.2 | 33.9/34.8/35.5 | 5.5/6.5/5.4    | ATT/ATT/ATA | TAA/TAA/TAA |
| <i>12S</i>  | 762/785/627       | 35.7/38.7/36.7 | 8.9/8.5/9.7    | 35.3/33.8/31.7 | 20.1/19.0/21.9 |             |             |
| <i>16S</i>  | 1,306/1,375/1,193 | 37.7/38.3/40.7 | 7.0/7.4/8.1    | 36.7/35.0/32.0 | 18.7/19.3/19.2 |             |             |
| <i>Ala</i>  | 65/69/65          | 40.0/39.1/40.0 | 9.2/10.1/12.3  | 36.9/39.1/36.9 | 13.8/11.6/10.8 |             |             |
| <i>Arg</i>  | 61/66/66          | 34.4/28.8/33.3 | 13.1/18.2/13.6 | 39.3/39.4/40.9 | 13.1/13.6/12.1 |             |             |
| <i>Asn</i>  | 58/64/64          | 34.5/35.9/32.8 | 15.5/9.4/10.9  | 29.3/42.2/42.2 | 20.7/12.5/14.1 |             |             |
| <i>Asp</i>  | 66/67/71          | 40.9/43.3/42.3 | 6.1/4.5/5.6    | 48.5/46.3/47.9 | 4.5/6.0/4.2    |             |             |
| <i>Cys</i>  | 62/64/62          | 35.5/39.1/38.7 | 11.3/7.8/8.1   | 38.7/35.9/35.5 | 14.5/17.2/17.7 |             |             |
| <i>Gln</i>  | 69/69/69          | 44.9/44.9/44.9 | 5.8/10.1/8.7   | 30.4/29.0/29.0 | 18.8/15.9/17.4 |             |             |
| <i>Glu</i>  | -/67/69           | -/46.3/42.0    | -/4.5/5.8      | -/41.8/40.6    | -/7.5/11.6     |             |             |

| Mitogenomes | Size (bp) | T%             | C%             | A%             | G%             |
|-------------|-----------|----------------|----------------|----------------|----------------|
| <i>Gly</i>  | 63/63/67  | 36.5/34.9/34.3 | 12.7/9.5/10.4  | 41.3/39.7/44.8 | 9.5/15.9/10.4  |
| <i>His</i>  | 64/65/67  | 39.1/43.1/37.3 | 4.7/6.2/4.5    | 35.9/30.8/34.3 | 20.3/20.0/23.9 |
| <i>Ile</i>  | 66/66/67  | 37.9/31.8/35.8 | 9.1/9.1/10.4   | 39.4/43.9/38.8 | 13.6/15.2/14.9 |
| <i>Leu1</i> | 66/67/69  | 33.3/34.3/31.9 | 6.1/7.5/7.2    | 34.8/38.8/39.1 | 25.8/19.4/21.7 |
| <i>Leu2</i> | 64/67/65  | 34.4/38.8/35.4 | 9.4/9.0/9.2    | 34.4/37.3/41.5 | 21.9/14.9/13.8 |
| <i>Lys</i>  | 70/70/70  | 34.3/32.9/28.6 | 17.1/14.3/18.6 | 35.7/38.6/37.1 | 12.9/14.3/15.7 |
| <i>Met</i>  | 68/69/69  | 33.8/31.9/31.9 | 17.6/18.8/18.8 | 35.3/33.3/33.3 | 13.2/15.9/15.9 |
| <i>Phe</i>  | 64/66/68  | 35.9/31.8/32.4 | 4.7/7.6/7.4    | 40.6/36.4/39.7 | 18.8/24.2/20.6 |
| <i>Pro</i>  | 64/64/63  | 37.5/40.6/38.1 | 6.3/7.8/7.9    | 35.9/28.1/31.7 | 20.3/23.4/22.2 |
| <i>Ser1</i> | 65/68/66  | 30.8/39.7/39.4 | 12.3/13.2/15.2 | 41.5/27.9/25.8 | 15.4/19.1/19.7 |
| <i>Ser2</i> | 48/64/66  | 29.2/35.9/34.8 | 8.3/7.8/9.1    | 43.8/42.2/43.9 | 18.8/14.1/12.1 |
| <i>Thr</i>  | 62/66/65  | 38.7/36.4/35.4 | 9.7/12.1/9.2   | 38.7/39.4/41.5 | 12.9/12.1/13.8 |
| <i>Trp</i>  | 65/67/66  | 35.4/34.3/31.8 | 12.3/13.4/13.6 | 40.0/43.3/40.9 | 12.3/9.0/13.6  |
| <i>Tyr</i>  | 65/66/67  | 35.4/39.4/34.3 | 10.8/6.1/9.0   | 32.3/34.8/37.3 | 21.5/19.7/19.4 |
| <i>Val</i>  | 67/68/68  | 40.3/27.9/38.2 | 7.5/23.5/11.8  | 35.8/36.8/32.4 | 16.4/11.8/17.6 |

<sup>a</sup>The mitochondrial genome is incomplete. <sup>b</sup>Data of genes are given as *D. nigrofasciatus*/ *E. chapei*/ *E. onthophagus*. (-) Missing data.
