# Supplementary material for: Phylomitogenomics of two Neotropical species of long-legged crickets Endecous Saussure, 1878 (Orthoptera: Phalangopsidae)
Source: PubMed Central journal article supplement (PMC11034622; doi:10.1590/1678-4685-gmb-2023-0144), 2024-04-15
Supplement: 1415-4757-GMB-46-03-s1-e20230144-s4.pdf [file 1415-4757-GMB-46-03-s1-e20230144-s4.pdf]

**Supplementary Material to “Phylomitogenomics of two Neotropical species of long-legged crickets *Endecous* Saussure, 1878 (Orthoptera: Phalangopsidae)”**

**Table S4** – Saturation test. a) Shows the number of operational units (NumOTU); index of substitutional saturation (Iss); critical index of substitutional saturation assuming a symmetrical topology (Iss.cSym); p-value; critical index of substitutional saturation assuming an asymmetrical topology (Iss.cAsym).

| Codon position | NumOTU | Iss   | Iss.cSym | T      | DF   | P      | Iss.cAsym | T      | DF   | P      |
|----------------|--------|-------|----------|--------|------|--------|-----------|--------|------|--------|
| Atp6 1+2       | 4      | 0.286 | 0.792    | 19.656 | 381  | 0.0000 | 0.759     | 18.363 | 381  | 0.0000 |
|                | 8      | 0.284 | 0.747    | 16.607 | 381  | 0.0000 | 0.635     | 12.599 | 381  | 0.0000 |
|                | 16     | 0.289 | 0.712    | 14.502 | 381  | 0.0000 | 0.503     | 7.333  | 381  | 0.0000 |
|                | 32     | 0.292 | 0.697    | 13.676 | 381  | 0.0000 | 0.370     | 2.619  | 381  | 0.0092 |
| Atp6 3         | 4      | 0.696 | 0.777    | 4.550  | 224  | 0.0220 | 0.762     | 1.888  | 224  | 0.0603 |
|                | 8      | 0.734 | 0.732    | 3.558  | 224  | 0.9572 | 0.631     | 3.084  | 224  | 0.0023 |
|                | 16     | 0.739 | 0.653    | 2.756  | 224  | 0.0063 | 0.458     | 9.052  | 224  | 0.0000 |
|                | 32     | 0.745 | 0.685    | 2.034  | 224  | 0.0431 | 0.364     | 12.914 | 224  | 0.0000 |
| Atp6           | 4      | 0.423 | 0.806    | 17.165 | 603  | 0.0000 | 0.775     | 15.774 | 603  | 0.0000 |
|                | 8      | 0.421 | 0.767    | 14.626 | 603  | 0.0000 | 0.658     | 9.999  | 603  | 0.0000 |
|                | 16     | 0.421 | 0.747    | 13.519 | 603  | 0.0000 | 0.537     | 4.838  | 603  | 0.0000 |
|                | 32     | 0.427 | 0.72     | 12.064 | 603  | 0.0000 | 0.395     | 1.319  | 603  | 0.1876 |
| Atp8 1+2       | 4      | 0.509 | 0.816    | 5.105  | 85   | 0.0000 | 0.871     | 6.01   | 85   | 0.0000 |
|                | 8      | 0.520 | 0.817    | 4.690  | 85   | 0.0000 | 0.777     | 4.044  | 85   | 0.0001 |
|                | 16     | 0.522 | 0.581    | 0.916  | 85   | 0.3625 | 0.500     | 0.349  | 85   | 0.7280 |
|                | 32     | 0.534 | 0.840    | 4.802  | 85   | 0.0000 | 0.648     | 1.795  | 85   | 0.0762 |
| Atp8 3         | 4      | 0.834 | 0.962    | 1.610  | 44   | 0.1145 | 1.127     | 3.682  | 44   | 0.0006 |
|                | 8      | 0.812 | 1.071    | 3.300  | 44   | 0.0019 | 1.147     | 4.270  | 44   | 0.0001 |
|                | 16     | 0.811 | 0.560    | 3.354  | 44   | 0.0016 | 0.722     | 1.190  | 44   | 0.2403 |
|                | 32     | 0.820 | 1.266    | 6.220  | 44   | 0.0000 | 1.381     | 7.838  | 44   | 0.0000 |
| Atp8           | 4      | 0.581 | 0.785    | 4.162  | 130  | 0.0001 | 0.801     | 4.486  | 130  | 0.0000 |
|                | 8      | 0.602 | 0.757    | 3.043  | 130  | 0.0028 | 0.681     | 1.535  | 130  | 0.1272 |
|                | 16     | 0.612 | 0.610    | 0.046  | 130  | 0.9634 | 0.459     | 3.032  | 130  | 0.0029 |
|                | 32     | 0.613 | 0.735    | 2.459  | 130  | 0.0152 | 0.460     | 3.075  | 130  | 0.0026 |
| COI 1+2        | 4      | 0.149 | 0.821    | 48.708 | 753  | 0.0000 | 0.789     | 46.389 | 753  | 0.0000 |
|                | 8      | 0.146 | 0.789    | 43.679 | 753  | 0.0000 | 0.684     | 36.519 | 753  | 0.0000 |
|                | 16     | 0.161 | 0.772    | 39.633 | 753  | 0.0000 | 0.575     | 26.846 | 753  | 0.0000 |
|                | 32     | 0.160 | 0.749    | 38.216 | 753  | 0.0000 | 0.445     | 18.467 | 753  | 0.0000 |
| COI 3          | 4      | 0.662 | 0.796    | 5.736  | 505  | 0.0000 | 0.762     | 4.281  | 505  | 0.0000 |
|                | 8      | 0.679 | 0.752    | 3.263  | 505  | 0.0012 | 0.641     | 1.691  | 505  | 0.0915 |
|                | 16     | 0.688 | 0.722    | 1.618  | 505  | 0.1063 | 0.513     | 8.333  | 505  | 0.0000 |
|                | 32     | 0.694 | 0.703    | 0.445  | 505  | 0.6563 | 0.378     | 15.791 | 505  | 0.0000 |
| COI            | 4      | 0.311 | 0.834    | 36.965 | 1274 | 0.0000 | 0.804     | 34.845 | 1274 | 0.0000 |
|                | 8      | 0.314 | 0.810    | 32.538 | 1274 | 0.0000 | 0.710     | 26.004 | 1274 | 0.0000 |
|                | 16     | 0.307 | 0.793    | 31.382 | 1274 | 0.0000 | 0.611     | 19.594 | 1274 | 0.0000 |
|                | 32     | 0.320 | 0.776    | 29.018 | 1274 | 0.0000 | 0.494     | 11.043 | 1274 | 0.0000 |
| COII 1+2       | 4      | 0.284 | 0.792    | 21.855 | 387  | 0.0000 | 0.759     | 20.427 | 387  | 0.0000 |
|                | 8      | 0.274 | 0.747    | 19.776 | 387  | 0.0000 | 0.635     | 15.101 | 387  | 0.0000 |
|                | 16     | 0.275 | 0.711    | 18.209 | 387  | 0.0000 | 0.502     | 9.468  | 387  | 0.0000 |
|                | 32     | 0.291 | 0.696    | 17.362 | 387  | 0.0000 | 0.369     | 3.349  | 387  | 0.0009 |
| COII 3         | 4      | 0.703 | 0.777    | 2.069  | 221  | 0.0397 | 0.762     | 1.668  | 221  | 0.0968 |
|                | 8      | 0.745 | 0.733    | 0.361  | 221  | 0.7185 | 0.631     | 3.278  | 221  | 0.0012 |
|                | 16     | 0.766 | 0.652    | 3.478  | 221  | 0.0006 | 0.458     | 9.447  | 221  | 0.0000 |

|           |    |       |       |        |     |        |       |        |     |        |
|-----------|----|-------|-------|--------|-----|--------|-------|--------|-----|--------|
|           | 32 | 0.784 | 0.686 | 3.183  | 221 | 0.0017 | 0.365 | 13.553 | 221 | 0.0000 |
| COII      | 4  | 0.417 | 0.806 | 18.307 | 612 | 0.0000 | 0.775 | 16.844 | 612 | 0.0000 |
|           | 8  | 0.413 | 0.767 | 15.799 | 612 | 0.0000 | 0.657 | 10.912 | 612 | 0.0000 |
|           | 16 | 0.409 | 0.746 | 15.144 | 612 | 0.0000 | 0.536 | 5.736  | 612 | 0.0000 |
|           | 32 | 0.430 | 0.720 | 13.130 | 612 | 0.0000 | 0.394 | 1.645  | 612 | 0.1005 |
| COIII 1+2 | 4  | 0.244 | 0.797 | 26.191 | 453 | 0.0000 | 0.764 | 24.608 | 453 | 0.0000 |
|           | 8  | 0.255 | 0.754 | 21.913 | 453 | 0.0000 | 0.642 | 17.025 | 453 | 0.0000 |
|           | 16 | 0.262 | 0.725 | 20.584 | 453 | 0.0000 | 0.515 | 11.257 | 453 | 0.0000 |
|           | 32 | 0.286 | 0.705 | 18.787 | 453 | 0.0000 | 0.378 | 4.136  | 453 | 0.0000 |
| COIII 3   | 4  | 0.728 | 0.778 | 1.593  | 255 | 0.1124 | 0.758 | 0.955  | 255 | 0.3406 |
|           | 8  | 0.741 | 0.732 | 0.297  | 255 | 0.7666 | 0.627 | 3.813  | 255 | 0.0002 |
|           | 16 | 0.763 | 0.666 | 3.596  | 255 | 0.0004 | 0.464 | 11.005 | 255 | 0.0000 |
|           | 32 | 0.788 | 0.682 | 4.177  | 255 | 0.0000 | 0.356 | 17.075 | 255 | 0.0000 |
| COIII     | 4  | 0.399 | 0.811 | 20.837 | 693 | 0.0000 | 0.780 | 19.258 | 693 | 0.0000 |
|           | 8  | 0.413 | 0.775 | 17.715 | 693 | 0.0000 | 0.667 | 12.421 | 693 | 0.0000 |
|           | 16 | 0.422 | 0.757 | 16.373 | 693 | 0.0000 | 0.551 | 6.304  | 693 | 0.0000 |
|           | 32 | 0.431 | 0.730 | 14.61  | 693 | 0.0000 | 0.411 | 0.960  | 693 | 0.3373 |
| CytB 1+2  | 4  | 0.304 | 0.810 | 25.433 | 623 | 0.0000 | 0.779 | 23.866 | 623 | 0.0000 |
|           | 8  | 0.318 | 0.773 | 20.840 | 623 | 0.0000 | 0.664 | 15.868 | 623 | 0.0000 |
|           | 16 | 0.331 | 0.754 | 18.582 | 623 | 0.0000 | 0.547 | 9.491  | 623 | 0.0000 |
|           | 32 | 0.357 | 0.728 | 15.805 | 623 | 0.0000 | 0.406 | 2.093  | 623 | 0.0367 |
| CytB 3    | 4  | 0.764 | 0.786 | 0.833  | 370 | 0.4053 | 0.756 | 0.283  | 370 | 0.7777 |
|           | 8  | 0.767 | 0.740 | 1.029  | 370 | 0.3041 | 0.629 | 5.276  | 370 | 0.0000 |
|           | 16 | 0.797 | 0.697 | 4.116  | 370 | 0.0000 | 0.488 | 12.740 | 370 | 0.0000 |
|           | 32 | 0.822 | 0.689 | 5.559  | 370 | 0.0000 | 0.359 | 19.315 | 370 | 0.0000 |
| CytB      | 4  | 0.430 | 0.825 | 22.443 | 964 | 0.0000 | 0.793 | 20.626 | 964 | 0.0000 |
|           | 8  | 0.474 | 0.795 | 17.066 | 964 | 0.0000 | 0.690 | 11.513 | 964 | 0.0000 |
|           | 16 | 0.482 | 0.778 | 15.464 | 964 | 0.0000 | 0.584 | 5.345  | 964 | 0.0000 |
|           | 32 | 0.508 | 0.756 | 12.855 | 964 | 0.0000 | 0.458 | 2.625  | 964 | 0.0088 |
| ND1 1+2   | 4  | 0.269 | 0.800 | 25.384 | 493 | 0.0000 | 0.769 | 23.861 | 493 | 0.0000 |
|           | 8  | 0.295 | 0.759 | 20.976 | 493 | 0.0000 | 0.648 | 15.977 | 493 | 0.0000 |
|           | 16 | 0.306 | 0.734 | 19.389 | 493 | 0.0000 | 0.523 | 9.852  | 493 | 0.0000 |
|           | 32 | 0.314 | 0.710 | 18.238 | 493 | 0.0000 | 0.382 | 3.141  | 493 | 0.0018 |
| ND1 3     | 4  | 0.701 | 0.780 | 2.543  | 284 | 0.0115 | 0.756 | 1.782  | 284 | 0.0757 |
|           | 8  | 0.721 | 0.733 | 0.423  | 284 | 0.6728 | 0.626 | 3.180  | 284 | 0.0016 |
|           | 16 | 0.730 | 0.675 | 1.954  | 284 | 0.0516 | 0.470 | 9.213  | 284 | 0.0000 |
|           | 32 | 0.752 | 0.682 | 2.638  | 284 | 0.0088 | 0.354 | 14.999 | 284 | 0.0000 |
| ND1       | 4  | 0.407 | 0.815 | 21.794 | 777 | 0.0000 | 0.784 | 20.108 | 777 | 0.0000 |
|           | 8  | 0.422 | 0.780 | 18.384 | 777 | 0.0000 | 0.673 | 12.883 | 777 | 0.0000 |
|           | 16 | 0.428 | 0.763 | 17.159 | 777 | 0.0000 | 0.560 | 6.774  | 777 | 0.0000 |
|           | 32 | 0.437 | 0.738 | 15.61  | 777 | 0.0000 | 0.424 | 0.673  | 777 | 0.5011 |
| ND2 1+2   | 4  | 0.516 | 0.803 | 12.349 | 589 | 0.0000 | 0.771 | 10.999 | 589 | 0.0000 |
|           | 8  | 0.511 | 0.762 | 10.361 | 589 | 0.0000 | 0.652 | 5.811  | 589 | 0.0000 |
|           | 16 | 0.526 | 0.739 | 8.943  | 589 | 0.0000 | 0.528 | 0.082  | 589 | 0.9349 |
|           | 32 | 0.537 | 0.714 | 7.582  | 589 | 0.0000 | 0.386 | 6.484  | 589 | 0.0000 |

|          |    |       |       |        |      |        |       |        |      |        |
|----------|----|-------|-------|--------|------|--------|-------|--------|------|--------|
| ND2 3    | 4  | 0.855 | 0.781 | 2.527  | 306  | 0.0120 | 0.756 | 3.403  | 306  | 0.0008 |
|          | 8  | 0.876 | 0.734 | 5.393  | 306  | 0.0000 | 0.626 | 9.530  | 306  | 0.0000 |
|          | 16 | 0.874 | 0.680 | 8.279  | 306  | 0.0000 | 0.474 | 17.059 | 306  | 0.0000 |
|          | 32 | 0.886 | 0.683 | 9.497  | 306  | 0.0000 | 0.354 | 24.904 | 306  | 0.0000 |
| ND2      | 4  | 0.618 | 0.817 | 10.606 | 893  | 0.0000 | 0.786 | 8.912  | 893  | 0.0000 |
|          | 8  | 0.622 | 0.784 | 8.394  | 893  | 0.0000 | 0.677 | 2.860  | 893  | 0.0043 |
|          | 16 | 0.630 | 0.767 | 7.273  | 893  | 0.0000 | 0.566 | 3.408  | 893  | 0.0007 |
|          | 32 | 0.641 | 0.742 | 5.598  | 893  | 0.0000 | 0.432 | 11.559 | 893  | 0.0000 |
| ND3 1+2  | 4  | 0.439 | 0.777 | 9.437  | 224  | 0.0000 | 0.761 | 8.988  | 224  | 0.0000 |
|          | 8  | 0.490 | 0.732 | 5.940  | 224  | 0.0000 | 0.630 | 3.423  | 224  | 0.0007 |
|          | 16 | 0.519 | 0.656 | 3.356  | 224  | 0.0009 | 0.460 | 1.450  | 224  | 0.1484 |
|          | 32 | 0.520 | 0.684 | 3.994  | 224  | 0.0001 | 0.362 | 3.834  | 224  | 0.0002 |
| ND3 3    | 4  | 0.827 | 0.793 | 0.709  | 116  | 0.4800 | 0.821 | 0.134  | 116  | 0.8933 |
|          | 8  | 0.874 | 0.773 | 2.205  | 116  | 0.0294 | 0.707 | 3.657  | 116  | 0.0004 |
|          | 16 | 0.911 | 0.599 | 7.137  | 116  | 0.0000 | 0.469 | 10.113 | 116  | 0.0000 |
|          | 32 | 0.928 | 0.763 | 3.820  | 116  | 0.0002 | 0.512 | 9.639  | 116  | 0.0000 |
| ND3      | 4  | 0.583 | 0.784 | 6.386  | 338  | 0.0000 | 0.756 | 5.472  | 338  | 0.0000 |
|          | 8  | 0.589 | 0.738 | 4.601  | 338  | 0.0000 | 0.628 | 1.191  | 338  | 0.2344 |
|          | 16 | 0.621 | 0.691 | 2.077  | 338  | 0.0385 | 0.483 | 4.134  | 338  | 0.0000 |
|          | 32 | 0.647 | 0.686 | 1.159  | 338  | 0.2473 | 0.356 | 8.723  | 338  | 0.0000 |
| ND4 1+2  | 4  | 0.537 | 0.816 | 14.209 | 701  | 0.0000 | 0.784 | 12.596 | 701  | 0.0000 |
|          | 8  | 0.577 | 0.782 | 10.236 | 701  | 0.0000 | 0.674 | 4.890  | 701  | 0.0000 |
|          | 16 | 0.619 | 0.764 | 7.158  | 701  | 0.0000 | 0.562 | 2.828  | 701  | 0.0048 |
|          | 32 | 0.652 | 0.739 | 4.134  | 701  | 0.0000 | 0.426 | 10.802 | 701  | 0.0000 |
| ND4 3    | 4  | 0.822 | 0.791 | 1.197  | 441  | 0.2319 | 0.758 | 2.504  | 441  | 0.0127 |
|          | 8  | 0.858 | 0.746 | 4.431  | 441  | 0.0000 | 0.634 | 8.866  | 441  | 0.0000 |
|          | 16 | 0.919 | 0.710 | 8.828  | 441  | 0.0000 | 0.501 | 17.688 | 441  | 0.0000 |
|          | 32 | 0.938 | 0.696 | 10.729 | 441  | 0.0000 | 0.368 | 25.245 | 441  | 0.0000 |
| ND4      | 4  | 0.650 | 0.830 | 11.329 | 1206 | 0.0000 | 0.798 | 9.352  | 1206 | 0.0000 |
|          | 8  | 0.666 | 0.803 | 8.366  | 1206 | 0.0000 | 0.701 | 2.157  | 1206 | 0.0312 |
|          | 16 | 0.672 | 0.786 | 6.895  | 1206 | 0.0000 | 0.599 | 4.427  | 1206 | 0.0000 |
|          | 32 | 0.705 | 0.767 | 3.758  | 1206 | 0.0002 | 0.477 | 13.835 | 1206 | 0.0000 |
| ND4I 1+2 | 4  | 0.369 | 0.777 | 11.129 | 179  | 0.0000 | 0.774 | 11.04  | 179  | 0.0000 |
|          | 8  | 0.380 | 0.738 | 9.149  | 179  | 0.0000 | 0.645 | 6.778  | 179  | 0.0000 |
|          | 16 | 0.383 | 0.634 | 6.496  | 179  | 0.0000 | 0.453 | 1.820  | 179  | 0.0705 |
|          | 32 | 0.393 | 0.698 | 8.040  | 179  | 0.0000 | 0.392 | 0.028  | 179  | 0.9775 |
| ND4I 3   | 4  | 0.743 | 0.817 | 1.338  | 88   | 0.1842 | 0.873 | 2.345  | 88   | 0.0213 |
|          | 8  | 0.765 | 0.82  | 1.024  | 88   | 0.3085 | 0.780 | 0.283  | 88   | 0.7780 |
|          | 16 | 0.787 | 0.58  | 4.035  | 88   | 0.0001 | 0.502 | 5.556  | 88   | 0.0000 |
|          | 32 | 0.798 | 0.844 | 0.949  | 88   | 0.3453 | 0.655 | 2.943  | 88   | 0.0042 |
| ND4I     | 4  | 0.481 | 0.779 | 9.121  | 268  | 0.0000 | 0.757 | 8.466  | 268  | 0.0000 |
|          | 8  | 0.499 | 0.732 | 6.797  | 268  | 0.0000 | 0.626 | 3.712  | 268  | 0.0002 |
|          | 16 | 0.499 | 0.668 | 4.998  | 268  | 0.0000 | 0.466 | 0.972  | 268  | 0.3319 |
|          | 32 | 0.511 | 0.680 | 5.124  | 268  | 0.0000 | 0.355 | 4.661  | 268  | 0.0000 |
| ND5 1+2  | 4  | 0.459 | 0.824 | 20.811 | 982  | 0.0000 | 0.792 | 18.990 | 982  | 0.0000 |

|         |    |       |       |        |      |        |       |        |      |        |
|---------|----|-------|-------|--------|------|--------|-------|--------|------|--------|
|         | 8  | 0.457 | 0.794 | 18.506 | 982  | 0.0000 | 0.690 | 12.783 | 982  | 0.0000 |
|         | 16 | 0.472 | 0.778 | 16.70  | 982  | 0.0000 | 0.584 | 6.126  | 982  | 0.0000 |
|         | 32 | 0.479 | 0.756 | 15.221 | 982  | 0.0000 | 0.457 | 1.184  | 982  | 0.2365 |
| ND5 3   | 4  | 0.787 | 0.799 | 0.545  | 556  | 0.5860 | 0.767 | 0.878  | 556  | 0.3802 |
|         | 8  | 0.832 | 0.757 | 3.437  | 556  | 0.0006 | 0.647 | 8.567  | 556  | 0.0000 |
|         | 16 | 0.864 | 0.731 | 6.437  | 556  | 0.0000 | 0.521 | 16.643 | 556  | 0.0000 |
|         | 32 | 0.864 | 0.709 | 8.141  | 556  | 0.0000 | 0.381 | 25.276 | 556  | 0.0000 |
| ND5     | 4  | 0.538 | 0.836 | 21.020 | 1537 | 0.0000 | 0.808 | 18.996 | 1537 | 0.0000 |
|         | 8  | 0.557 | 0.815 | 17.573 | 1537 | 0.0000 | 0.717 | 10.92  | 1537 | 0.0000 |
|         | 16 | 0.580 | 0.797 | 14.956 | 1537 | 0.0000 | 0.619 | 2.718  | 1537 | 0.0066 |
|         | 32 | 0.590 | 0.781 | 13.385 | 1537 | 0.0000 | 0.504 | 5.978  | 1537 | 0.0000 |
| ND6 1+2 | 4  | 0.600 | 0.783 | 5.673  | 316  | 0.0000 | 0.755 | 4.812  | 316  | 0.0000 |
|         | 8  | 0.599 | 0.736 | 4.005  | 316  | 0.0001 | 0.627 | 0.804  | 316  | 0.4222 |
|         | 16 | 0.604 | 0.687 | 2.380  | 316  | 0.0179 | 0.480 | 3.570  | 316  | 0.0004 |
|         | 32 | 0.620 | 0.685 | 1.824  | 316  | 0.0691 | 0.355 | 7.475  | 316  | 0.0000 |
| ND6 3   | 4  | 0.861 | 0.778 | 2.158  | 167  | 0.0323 | 0.779 | 2.137  | 167  | 0.0340 |
|         | 8  | 0.897 | 0.741 | 4.512  | 167  | 0.0000 | 0.652 | 7.101  | 167  | 0.0000 |
|         | 16 | 0.911 | 0.628 | 9.360  | 167  | 0.0000 | 0.453 | 15.127 | 167  | 0.0000 |
|         | 32 | 0.925 | 0.705 | 7.846  | 167  | 0.0000 | 0.404 | 18.566 | 167  | 0.0000 |
| ND6     | 4  | 0.681 | 0.796 | 4.512  | 482  | 0.0000 | 0.762 | 3.171  | 482  | 0.0016 |
|         | 8  | 0.698 | 0.752 | 2.061  | 482  | 0.0399 | 0.640 | 2.197  | 482  | 0.0285 |
|         | 16 | 0.698 | 0.721 | 0.877  | 482  | 0.3807 | 0.512 | 7.148  | 482  | 0.0000 |
|         | 32 | 0.712 | 0.703 | 0.341  | 482  | 0.7331 | 0.378 | 12.789 | 482  | 0.0000 |

b) Interpretation of results.

| Significant Difference (p-value) |                   |                            |
|----------------------------------|-------------------|----------------------------|
|                                  | Yes               | No                         |
| Iss < Iss.c                      | Little saturation | Substantial saturation     |
| Iss > Iss.c                      | Useless sequences | Very poor for phylogenetic |
