# Supplementary material for: Phylomitogenomics of two Neotropical species of long-legged crickets Endecous Saussure, 1878 (Orthoptera: Phalangopsidae)
Source: PubMed Central journal article supplement (PMC11034622; doi:10.1590/1678-4685-gmb-2023-0144), 2024-04-15
Supplement: 1415-4757-GMB-46-03-s1-e20230144-s5.pdf [file 1415-4757-GMB-46-03-s1-e20230144-s5.pdf]

**Supplementary Material to “Phylomitogenomics of two Neotropical species of long-legged crickets *Endecous*  
*Saussure, 1878 (Orthoptera: Phalangopsidae)”***

**Table S5** – Codon usage analysis of *Dianemobius nigrofasciatus*, *Endecous chape* and *E. onthophagus* mitogenomes.

| Codon   | Count       | RSCU            | Codon  | Count       | RSCU           | Codon   | Count    | RSCU           |
|---------|-------------|-----------------|--------|-------------|----------------|---------|----------|----------------|
| UUU(F)  | 253/244/238 | 1.55/1.55/1.47  | CCC(P) | 26/20/26    | 0.76/0.58/0.72 | GAU(D)  | 57/58/59 | 1.73/1.57/1.64 |
| UUC(F)  | 74/71/86    | 0.45/0.45/0.53  | CCA(P) | 42/41/38    | 1.23/1.20/1.06 | GAC(D)  | 9/16/13  | 0.27/0.43/0.36 |
| UUA(L2) | 336/354/299 | 3.45/3.64/3.03  | CCG(P) | 2/2/4       | 0.06/0.06/0.11 | GAA(E)  | 81/67/64 | 1.71/1.70/1.64 |
| UUG(L2) | 70/57/89    | 0.72/0.59/0.90  | ACU(T) | 66/84/79    | 1.58/1.69/1.63 | GAG(E)  | 14/12/14 | 0.29/0.30/0.36 |
| CUU(L1) | 69/80/86    | 0.71//0.82/0.87 | ACC(T) | 24/31/27    | 0.57/0.62/0.56 | UGU(C)  | 41/40/40 | 1.78/1.82/1.95 |
| CUC(L1) | 30/25/24    | 0.31/0.26/0.24  | ACA(T) | 71/79/84    | 1.70/1.59/1.73 | UGC(C)  | 5/4/1    | 0.22/0.18/0.05 |
| CUA(L1) | 73/64/85    | 0.75/0.66/0.86  | ACG(T) | 6/5/4       | 0.14/0.10/0.08 | UGG(W)  | 13/7/11  | 1.00/1.00/1.00 |
| CUG(L1) | 7/4/9       | 0.07/0.04/0.09  | GCU(A) | 71/81/83    | 2.04/1.87/1.90 | CGU(R)  | 15/22/21 | 0.59/1.05/0.98 |
| AUU(I)  | 334/288/252 | 1.70/1.56/1.52  | GCC(A) | 15/29/30    | 0.43/0.67/0.69 | CGC(R)  | 5/3/5    | 0.20/0.14/0.23 |
| AUC(I)  | 53/73/75    | 0.27/0.40/0.45  | GCA(A) | 48/56/56    | 1.38/1.29/1.28 | CGA(R)  | 27/29/28 | 1.07/1.38/1.31 |
| AUA(I)  | 201/193/170 | 1.03/1.05/1.03  | GCG(A) | 5/7/6       | 0.14/0.16/0.14 | CGG(R)  | 8/6/8    | 0.32/0.29/0.38 |
| AUG(M)  | 65/48/57    | 1.00/1.00/1.00  | UAU(Y) | 128/137/124 | 1.65/1.72/1.51 | AGU(S1) | 19/39/32 | 0.43/0.85/0.72 |
| GUU(V)  | 83/80/71    | 1.87/1.71/1.31  | UAC(Y) | 27/22/40    | 0.35/0.28/0.49 | AGC(S1) | 3/4/10   | 0.07/0.09/0.23 |
| GUC(V)  | 10/11/17    | 0.22/0.24/0.31  | CAU(H) | 54/66/62    | 1.44/1.53/1.48 | AGA(R)  | 89/60/61 | 3.51/2.86/2.86 |
| GUA(V)  | 59/72/95    | 1.33/1.54/1.76  | CAC(H) | 21/20/22    | 0.56/0.47/0.52 | AGG(R)  | 8/6/5    | 0.32/0.29/0.23 |
| GUG(V)  | 26/24/33    | 0.58/0.51/0.61  | CAA(Q) | 59/64/66    | 1.79/1.71/1.69 | GGU(G)  | 55/68/81 | 0.96/1.12/1.32 |

|         |            |                |        |             |                |        |             |                |
|---------|------------|----------------|--------|-------------|----------------|--------|-------------|----------------|
| UCU(S2) | 97/104/101 | 2.17/2.27/2.29 | CAG(Q) | 7/11/12     | 0.21/0.29/0.31 | GGC(G) | 11/7/12     | 0.19/0.12/0.20 |
| UCC(S2) | 54/34/29   | 1.21/0.74/0.66 | AAU(N) | 138/135/147 | 1.53/1.67/1.72 | GGA(G) | 135/135/115 | 2.36/2.22/1.87 |
| UCA(S2) | 86/92/92   | 1.93/2.01/2.08 | AAC(N) | 42/27/24    | 0.47/0.33/0.28 | GGG(G) | 28/33/38    | 0.49/0.54/0.62 |
| UCG(S2) | 9/2/1      | 0.20/0.04/0.02 | AAA(K) | 67/61/56    | 1.46/1.51/1.44 |        |             |                |
| CCU(P)  | 67/74/76   | 1.96/2.16/2.11 | AAG(K) | 25/20/22    | 0.54/0.49/0.56 |        |             |                |

<sup>a</sup>Data of genes are given as *D. nigrofasciatus*/ *E. chapei*/ *E. onthophagus*.
