# Supplementary material for: Phylomitogenomics of two Neotropical species of long-legged crickets Endecous Saussure, 1878 (Orthoptera: Phalangopsidae)
Source: PubMed Central journal article supplement (PMC11034622; doi:10.1590/1678-4685-gmb-2023-0144), 2024-04-15
Supplement: 1415-4757-GMB-46-03-s1-e20230144-s7.pdf [file 1415-4757-GMB-46-03-s1-e20230144-s7.pdf]

**Supplementary Material to “Phylomitogenomics of two Neotropical species of long-legged crickets *Endecous* Saussure, 1878 (Orthoptera: Phalangopsidae)”**

a) RF for each gene in the group

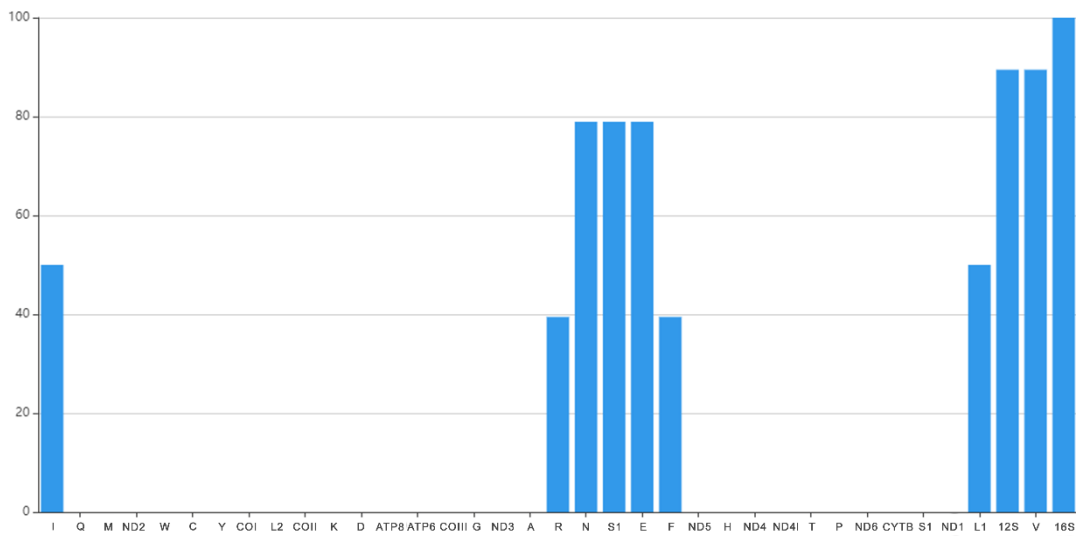

b) RS for each species

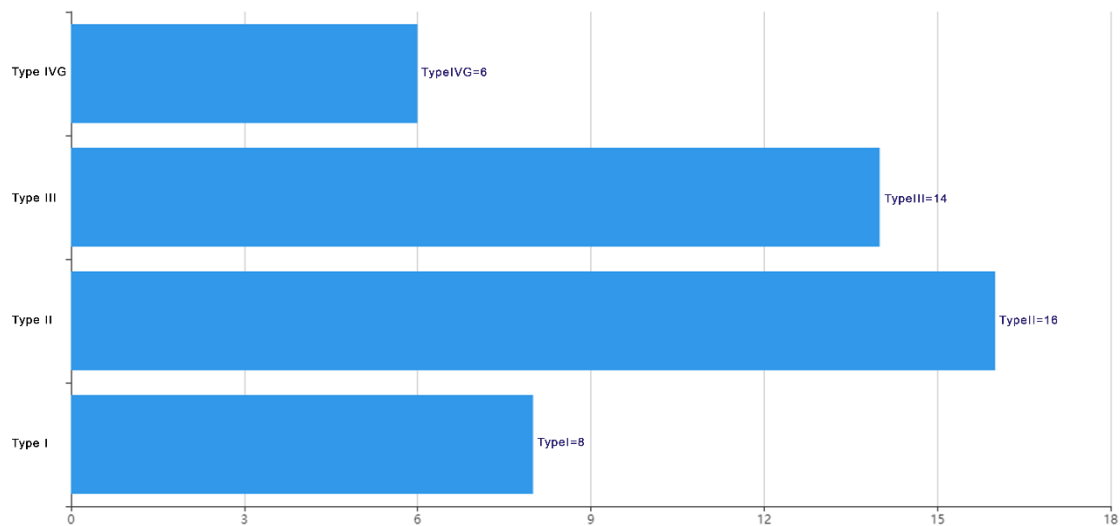

**Figure S2** - Rearrangements analysis with the web server qMGR, using the usual mitochondrial gene order of invertebrates as reference. a) RF of each gene within a particular group. b) Total RS of a species or a mitogenome.
